# Supplementary material for: Initial Validation of the Mindful Presence Scale: The Issue of the Construal Level of Scale Items
Source: Front Psychol. 2021 Jul 21;12:626084. doi: 10.3389/fpsyg.2021.626084 (PMC8333280; doi:10.3389/fpsyg.2021.626084)
Supplement: Supplementary file 2 [file Table_2.XLSX]

## Sheet: Sheet1
high.pos1	high.pos2	high.pos3	low.pos1	low.pos2	low.pos3	high	low	comp
3	3	3	2	1	2	3	1.66667	2.33333
4	2	1	3	3	1	2.33333	2.33333	2.33333
4	5	4	4	4	4	4.33333	4	4.16667
5	5	4	2	4	2	4.66667	2.66667	3.66667
3	4	2	3	4	1	3	2.66667	2.83333
3	6	3	1	1	1	4	1	2.5
4	5	4	2	1	1	4.33333	1.33333	2.83333
4	3	3	3	1	1	3.33333	1.66667	2.5
3	3	3	3	3	3	3	3	3
6	5	3	2	3	2	4.66667	2.33333	3.5
3	2	2	2	4	2	2.33333	2.66667	2.5
4	2	2	1	2	1	2.66667	1.33333	2
3	2	3	3	1	2	2.66667	2	2.33333
6	6	6	6	6	6	6	6	6
3	4	4	1	1	4	3.66667	2	2.83333
2	5	3	1	2	1	3.33333	1.33333	2.33333
4	2	3	1	2	1	3	1.33333	2.16667
1	2	1	1	3	2	1.33333	2	1.66667
4	3	4	1	3	1	3.66667	1.66667	2.66667
3	3	3	1	2	1	3	1.33333	2.16667
4	3	3	2	2	2	3.33333	2	2.66667
5	5	5	5	5	5	5	5	5
3	3	3	1	2	1	3	1.33333	2.16667
4	3	2	2	5	1	3	2.66667	2.83333
4	3	2	3	6	2	3	3.66667	3.33333
4	5	2	3	3	3	3.66667	3	3.33333
3	3	3	1	3	3	3	2.33333	2.66667
3	2	2	2	4	2	2.33333	2.66667	2.5
4	4	4	4	4	4	4	4	4
3	3	2	1	1	1	2.66667	1	1.83333
3	5	4	6	1	1	4	2.66667	3.33333
4	3	2	4	3	3	3	3.33333	3.16667
4	4	3	4	4	4	3.66667	4	3.83333
3	3	2	3	3	1	2.66667	2.33333	2.5
4	3	3	3	3	1	3.33333	2.33333	2.83333
5	3	4	1	2	3	4	2	3
3	2	3	1	1	2	2.66667	1.33333	2
4	2	3	3	3	3	3	3	3
2	2	2	2	2	5	2	3	2.5
3	4	3	5	3	3	3.33333	3.66667	3.5
3	2	3	3	2	4	2.66667	3	2.83333
4	4	3	5	5	5	3.66667	5	4.33333
4	4	3	3	3	2	3.66667	2.66667	3.16667
4	3	4	3	3	3	3.66667	3	3.33333
5	4	6	4	4	3	5	3.66667	4.33333
5	4	5	2	3	3	4.66667	2.66667	3.66667
2	3	2	1	1	1	2.33333	1	1.66667
2	2	2	2	4	1	2	2.33333	2.16667
4	3	4	3	2	2	3.66667	2.33333	3
2	2	6	2	2	2	3.33333	2	2.66667
3	4	3	4	4	3	3.33333	3.66667	3.5
5	5	6	4	4	5	5.33333	4.33333	4.83333
1	2	1	3	1	1	1.33333	1.66667	1.5
3	3	2	3	2	2	2.66667	2.33333	2.5
3	2	2	2	1	5	2.33333	2.66667	2.5
4	3	3	4	3	3	3.33333	3.33333	3.33333
5	4	4	3	3	3	4.33333	3	3.66667
6	3	3	2	5	6	4	4.33333	4.16667
4	4	4	3	3	3	4	3	3.5
5	4	4	3	3	2	4.33333	2.66667	3.5
3	3	3	4	5	2	3	3.66667	3.33333
4	4	4	1	1	1	4	1	2.5
4	3	3	2	1	2	3.33333	1.66667	2.5
3	3	3	3	3	3	3	3	3
3	3	3	1	3	3	3	2.33333	2.66667
4	4	5	3	3	3	4.33333	3	3.66667
3	3	1	4	3	4	2.33333	3.66667	3
4	2	3	2	4	4	3	3.33333	3.16667
4	5	5	4	2	1	4.66667	2.33333	3.5
4	4	4	4	4	4	4	4	4
3	3	3	2	3	2	3	2.33333	2.66667
3	3	3	3	3	3	3	3	3
4	4	5	4	3	3	4.33333	3.33333	3.83333
2	2	2	1	1	1	2	1	1.5
3	4	3	3	2	1	3.33333	2	2.66667
4	4	5	1	2	2	4.33333	1.66667	3
3	4	3	3	4	1	3.33333	2.66667	3
3	4	3	3	5	3	3.33333	3.66667	3.5
2	2	1	3	3	3	1.66667	3	2.33333
3	3	3	3	2	3	3	2.66667	2.83333
5	3	3	2	2	3	3.66667	2.33333	3
3	2	2	2	5	3	2.33333	3.33333	2.83333
4	3	3	4	5	2	3.33333	3.66667	3.5
1	1	1	1	1	1	1	1	1
3	3	2	2	2	1	2.66667	1.66667	2.16667
5	3	3	5	5	4	3.66667	4.66667	4.16667
3	3	3	4	4	2	3	3.33333	3.16667
4	4	4	3	3	3	4	3	3.5
3	1	2	2	3	3	2	2.66667	2.33333
1	1	1	1	1	3	1	1.66667	1.33333
4	2	2	1	1	1	2.66667	1	1.83333
3	3	3	1	2	2	3	1.66667	2.33333
3	1	3	2	2	3	2.33333	2.33333	2.33333
4	2	2	2	4	1	2.66667	2.33333	2.5
3	2	2	4	4	4	2.33333	4	3.16667
4	1	2	2	5	1	2.33333	2.66667	2.5
3	4	4	3	3	3	3.66667	3	3.33333
1	2	1	1	2	2	1.33333	1.66667	1.5
3	3	1	6	4	5	2.33333	5	3.66667
2	2	1	3	2	2	1.66667	2.33333	2
4	4	4	5	5	5	4	5	4.5
2	3	1	1	2	1	2	1.33333	1.66667
4	2	2	1	2	1	2.66667	1.33333	2
3	3	5	1	4	1	3.66667	2	2.83333
4	4	4	2	4	4	4	3.33333	3.66667
3	3	2	2	4	3	2.66667	3	2.83333
2	2	2	2	2	1	2	1.66667	1.83333
2	4	4	3	3	3	3.33333	3	3.16667
3	3	3	3	3	1	3	2.33333	2.66667
4	6	5	3	4	3	5	3.33333	4.16667
5	3	5	1	1	1	4.33333	1	2.66667
3	3	3	2	2	2	3	2	2.5
3	3	2	1	1	1	2.66667	1	1.83333
4	2	2	1	4	4	2.66667	3	2.83333
2	2	2	3	4	2	2	3	2.5
4	3	3	2	3	3	3.33333	2.66667	3
5	3	4	1	5	1	4	2.33333	3.16667
3	1	3	1	1	2	2.33333	1.33333	1.83333
3	4	4	3	3	4	3.66667	3.33333	3.5
3	5	4	2	1	1	4	1.33333	2.66667
3	3	1	6	2	6	2.33333	4.66667	3.5
5	5	5	1	3	2	5	2	3.5
1	1	1	2	2	1	1	1.66667	1.33333
3	4	3	3	3	3	3.33333	3	3.16667
2	3	3	1	4	1	2.66667	2	2.33333
4	5	5	4	5	5	4.66667	4.66667	4.66667
6	6	6	6	6	6	6	6	6
4	4	4	5	2	4	4	3.66667	3.83333
2	2	3	3	4	3	2.33333	3.33333	2.83333
2	2	1	4	5	1	1.66667	3.33333	2.5
4	5	4	2	2	2	4.33333	2	3.16667
2	2	2	4	4	3	2	3.66667	2.83333
4	3	3	2	2	3	3.33333	2.33333	2.83333
4	2	4	6	4	1	3.33333	3.66667	3.5
6	6	6	1	5	1	6	2.33333	4.16667
2	1	1	2	4	1	1.33333	2.33333	1.83333
3	3	3	1	4	1	3	2	2.5
3	4	3	6	4	4	3.33333	4.66667	4
3	2	3	5	2	1	2.66667	2.66667	2.66667
1	1	1	4	5	1	1	3.33333	2.16667
3	3	3	3	1	3	3	2.33333	2.66667
3	3	3	2	2	1	3	1.66667	2.33333
2	3	3	3	3	3	2.66667	3	2.83333
3	3	3	3	3	3	3	3	3
3	2	2	1	3	2	2.33333	2	2.16667
4	3	3	2	3	3	3.33333	2.66667	3
5	4	4	5	5	4	4.33333	4.66667	4.5
3	2	4	5	2	3	3	3.33333	3.16667
4	4	4	3	3	3	4	3	3.5
2	2	2	3	1	1	2	1.66667	1.83333
4	3	3	4	5	3	3.33333	4	3.66667
3	3	3	3	3	4	3	3.33333	3.16667
3	3	2	4	1	1	2.66667	2	2.33333
3	3	3	3	3	4	3	3.33333	3.16667
3	3	3	2	3	3	3	2.66667	2.83333
1	3	3	1	1	1	2.33333	1	1.66667
3	2	3	1	2	4	2.66667	2.33333	2.5
3	4	3	2	5	1	3.33333	2.66667	3
3	3	3	3	2	2	3	2.33333	2.66667
3	3	3	4	3	3	3	3.33333	3.16667
3	3	2	3	3	2	2.66667	2.66667	2.66667
2	3	3	3	4	1	2.66667	2.66667	2.66667
4	4	4	3	3	3	4	3	3.5
3	3	2	1	1	1	2.66667	1	1.83333
4	2	3	3	5	3	3	3.66667	3.33333
3	3	2	3	3	3	2.66667	3	2.83333
3	2	2	3	3	3	2.33333	3	2.66667
5	4	4	1	1	1	4.33333	1	2.66667
3	3	3	3	2	1	3	2	2.5
4	3	3	2	5	2	3.33333	3	3.16667
5	6	3	1	1	4	4.66667	2	3.33333
3	1	3	2	3	4	2.33333	3	2.66667
4	3	3	5	5	5	3.33333	5	4.16667
3	3	3	2	3	3	3	2.66667	2.83333
2	3	3	4	5	3	2.66667	4	3.33333
3	2	2	3	3	3	2.33333	3	2.66667
2	2	4	4	3	3	2.66667	3.33333	3
4	3	3	3	3	1	3.33333	2.33333	2.83333
4	4	4	2	2	1	4	1.66667	2.83333
4	3	4	3	4	3	3.66667	3.33333	3.5
4	4	4	5	4	3	4	4	4
3	2	1	1	3	2	2	2	2
4	4	4	1	1	2	4	1.33333	2.66667
5	4	5	5	5	5	4.66667	5	4.83333
5	3	5	2	3	3	4.33333	2.66667	3.5
5	5	5	5	5	5	5	5	5
4	5	4	3	4	3	4.33333	3.33333	3.83333
3	6	3	3	3	3	4	3	3.5
4	4	3	1	2	2	3.66667	1.66667	2.66667
5	6	5	5	5	3	5.33333	4.33333	4.83333
3	3	4	2	3	3	3.33333	2.66667	3
3	3	3	2	2	1	3	1.66667	2.33333
2	3	3	5	6	3	2.66667	4.66667	3.66667
2	4	4	3	2	4	3.33333	3	3.16667
4	4	4	4	4	4	4	4	4
4	4	4	4	3	2	4	3	3.5
1	1	1	1	3	1	1	1.66667	1.33333
4	3	3	2	3	3	3.33333	2.66667	3
2	6	2	2	2	1	3.33333	1.66667	2.5
3	3	2	3	3	3	2.66667	3	2.83333
5	5	4	4	4	4	4.66667	4	4.33333
5	5	5	3	3	1	5	2.33333	3.66667
3	3	3	4	3	3	3	3.33333	3.16667
2	2	4	3	3	2	2.66667	2.66667	2.66667
3	3	4	2	2	2	3.33333	2	2.66667
3	3	3	3	3	3	3	3	3
4	4	4	3	3	3	4	3	3.5
4	4	4	4	4	4	4	4	4
3	3	2	6	4	1	2.66667	3.66667	3.16667
4	4	3	3	3	3	3.66667	3	3.33333
2	2	1	1	2	2	1.66667	1.66667	1.66667
2	1	1	2	2	2	1.33333	2	1.66667
4	2	4	3	5	4	3.33333	4	3.66667
5	4	4	2	2	1	4.33333	1.66667	3
5	5	5	4	5	4	5	4.33333	4.66667
