# Supplementary material for: Initial Validation of the Mindful Presence Scale: The Issue of the Construal Level of Scale Items
Source: Front Psychol. 2021 Jul 21;12:626084. doi: 10.3389/fpsyg.2021.626084 (PMC8333280; doi:10.3389/fpsyg.2021.626084)
Supplement: Supplementary file 3 [file Table_3.XLSX]

## Sheet: Sheet1
h1n	h2n	h3n	l1n	l2n	l3n	h1p	h2p	h3p	l1p	l2p	l3p
1	1	1	1	1	1	6	6	6	6	6	6
1	1	1	1	1	1	6	6	6	6	6	6
1	1	1	1	1	1	6	6	6	6	6	6
2	2	2	2	2	2	5	5	5	5	5	5
2	2	2	2	2	2	5	5	5	5	5	5
2	2	2	2	2	2	5	5	5	5	5	5
2	2	2	2	2	2	5	5	5	5	5	5
2	2	2	2	2	2	5	5	5	5	5	5
2	2	2	2	2	2	5	5	5	5	5	5
2	3	4	1	3	1	4	4	5	4	5	1
2	3	4	1	3	1	4	4	5	4	5	1
3	3	3	3	3	3	3	3	3	3	3	3
3	3	3	3	3	3	3	3	3	3	3	3
3	3	3	3	3	3	4	4	4	4	4	4
1	1	1	1	3	2	3	3	6	3	3	3
1	1	1	3	2	3	6	4	3	5	4	6
1	1	1	3	3	3	3	3	3	4	4	3
1	1	1	3	4	5	6	2	2	2	4	5
1	1	1	4	4	3	1	1	1	5	5	2
1	1	1	6	1	6	6	6	6	6	6	1
1	1	2	1	1	1	3	1	3	1	1	1
1	1	2	1	1	3	1	2	1	4	1	3
1	1	2	1	3	3	2	2	1	1	1	2
1	1	2	1	3	4	4	3	3	1	1	1
1	1	2	2	2	2	2	2	2	2	2	2
1	1	3	1	1	1	1	3	5	2	2	2
1	1	3	2	2	4	4	3	4	3	3	5
1	2	1	1	1	1	1	1	1	1	1	1
1	2	1	1	1	1	1	2	1	1	1	1
1	2	1	1	3	1	2	1	3	2	3	3
1	2	1	6	5	5	4	4	2	6	4	5
1	2	2	1	1	1	1	2	6	2	2	1
1	2	2	1	1	1	2	3	2	1	2	2
1	2	2	2	2	3	1	2	3	3	3	3
1	2	2	3	3	3	4	6	4	3	3	4
1	2	2	3	3	5	4	2	5	5	2	5
1	2	2	5	5	5	6	6	2	2	2	2
1	2	4	2	1	4	5	4	4	2	2	3
1	2	5	6	3	3	2	2	5	4	3	4
1	3	1	2	1	1	1	1	2	1	1	1
1	3	1	2	2	2	1	1	1	2	2	2
1	3	2	2	4	1	4	5	3	5	6	4
1	3	4	2	2	5	4	5	4	1	6	6
2	1	1	1	2	2	3	3	3	2	4	3
2	1	1	2	3	4	4	5	2	1	5	3
2	1	1	3	2	1	3	2	2	1	1	1
2	1	1	4	2	6	2	3	2	3	3	3
2	1	1	4	4	1	3	3	2	3	5	5
2	1	2	1	2	3	3	4	4	2	1	5
2	1	2	2	3	3	3	3	3	4	2	1
2	1	2	4	2	4	4	4	2	2	3	3
2	1	3	1	1	4	4	1	3	4	2	3
2	1	3	2	2	3	3	4	5	3	3	3
2	1	3	3	1	5	1	2	1	3	2	1
2	1	3	3	4	4	2	1	2	3	4	3
2	1	4	1	6	3	3	6	5	1	6	1
2	2	1	1	2	3	2	2	3	3	4	4
2	2	1	1	3	5	2	3	1	1	1	6
2	2	1	1	6	6	6	6	5	6	5	5
2	2	1	2	1	2	5	5	5	5	5	6
2	2	1	3	3	4	3	2	3	2	3	3
2	2	2	1	2	1	4	4	5	3	3	3
2	2	2	1	2	2	2	2	2	2	3	3
2	2	2	1	2	2	4	4	4	3	3	3
2	2	2	1	2	4	3	3	3	3	3	3
2	2	2	1	3	2	2	2	2	2	2	2
2	2	2	1	3	5	2	2	2	1	2	2
2	2	2	2	2	2	3	3	3	1	3	2
2	2	2	2	2	2	3	3	3	3	3	3
2	2	2	2	2	2	4	4	4	4	4	3
2	2	2	2	2	2	5	4	4	5	5	5
2	2	2	2	2	2	5	5	5	5	6	5
2	2	2	2	3	3	2	2	1	1	1	1
2	2	2	2	3	4	3	5	4	4	4	4
2	2	2	2	4	4	2	2	2	2	3	3
2	2	2	3	1	1	6	6	5	5	5	5
2	2	2	3	3	5	4	5	5	5	4	2
2	2	2	4	2	4	4	5	1	4	5	3
2	2	2	4	3	3	4	4	4	3	3	1
2	2	3	2	2	2	3	3	3	3	3	3
2	2	3	3	2	4	5	2	3	2	2	2
2	2	3	3	4	5	3	4	3	3	4	5
2	2	3	4	3	6	4	4	3	1	2	2
2	2	4	2	2	3	5	5	5	4	5	4
2	2	4	5	4	6	3	3	2	6	5	4
2	3	1	1	1	1	4	3	1	1	3	1
2	3	2	1	1	5	3	4	3	3	2	3
2	3	2	3	3	2	4	4	5	5	5	4
2	3	2	3	3	5	1	3	1	1	1	4
2	3	2	4	2	4	4	4	3	3	3	3
2	3	2	4	4	3	4	5	3	3	5	4
2	3	3	2	2	4	4	5	4	5	4	3
2	3	3	3	2	3	5	4	4	4	5	4
2	3	3	3	3	3	2	4	6	5	6	5
2	3	3	3	3	3	3	4	4	3	3	3
2	3	3	3	5	5	4	2	4	4	4	4
2	3	3	4	6	6	3	4	4	4	4	4
2	3	5	5	3	4	4	4	4	2	2	2
2	3	6	3	1	6	3	4	4	2	1	2
2	4	4	3	4	4	4	4	4	5	5	5
2	6	5	5	6	5	5	5	2	2	4	1
3	1	1	1	1	1	1	2	1	1	1	1
3	1	1	2	1	3	3	5	4	3	3	3
3	1	1	2	2	2	2	1	2	2	2	1
3	1	1	3	3	4	6	2	3	2	2	1
3	1	1	6	3	6	3	3	2	1	1	1
3	1	2	2	3	5	2	2	2	1	4	1
3	1	2	2	4	5	3	6	3	2	4	4
3	1	2	3	1	3	4	3	2	2	1	1
3	1	2	3	2	3	2	5	5	5	1	1
3	1	3	1	1	6	1	4	4	1	3	2
3	1	3	1	3	4	2	2	4	3	2	2
3	1	3	4	4	6	4	5	6	6	6	6
3	1	4	1	4	3	4	4	4	3	4	3
3	1	5	2	5	6	2	5	2	2	2	2
3	2	1	2	2	2	4	4	2	1	4	4
3	2	1	2	2	3	5	3	5	3	4	3
3	2	1	4	4	5	2	4	1	2	2	2
3	2	2	1	1	2	3	4	4	1	1	1
3	2	2	1	2	5	4	5	5	2	3	6
3	2	2	2	1	1	2	1	2	1	1	2
3	2	2	2	2	2	4	5	4	4	4	4
3	2	2	2	2	2	5	5	5	2	5	1
3	2	2	2	2	2	5	5	5	3	3	3
3	2	2	2	4	2	4	4	4	2	3	2
3	2	2	3	2	3	3	3	2	5	5	5
3	2	2	3	2	3	3	4	3	3	3	3
3	2	2	3	3	3	4	3	4	1	2	2
3	2	2	3	3	5	4	4	3	1	2	2
3	2	2	4	1	4	3	4	6	1	2	2
3	2	2	4	4	3	4	3	3	4	3	3
3	2	2	5	3	5	3	3	3	2	2	2
3	2	3	1	2	2	4	4	4	3	3	2
3	2	3	2	3	2	4	5	4	5	4	5
3	2	3	3	3	3	3	2	3	3	3	3
3	2	3	3	3	4	4	4	3	3	3	1
3	2	3	3	3	4	4	4	4	3	4	2
3	2	3	3	5	5	4	3	3	3	5	5
3	2	3	3	5	6	4	4	4	1	3	2
3	2	3	4	3	3	3	3	3	3	3	3
3	2	3	4	3	3	4	4	6	1	3	2
3	2	4	1	2	3	4	4	4	4	2	3
3	2	4	1	3	4	3	3	4	4	4	3
3	2	4	2	3	5	3	3	4	2	3	4
3	2	4	4	1	3	3	3	4	2	2	1
3	2	4	4	5	5	4	4	3	2	3	3
3	2	5	2	4	3	3	4	3	2	2	3
3	3	1	2	1	3	2	1	1	1	1	4
3	3	1	2	1	5	1	2	4	1	1	1
3	3	1	3	3	4	2	4	2	2	4	2
3	3	2	1	1	6	2	2	2	1	2	1
3	3	2	1	3	2	3	3	3	3	3	3
3	3	2	2	1	1	2	2	2	1	1	1
3	3	2	2	4	4	4	4	4	4	4	4
3	3	2	3	2	2	4	4	4	5	5	5
3	3	2	3	3	3	4	5	4	4	4	4
3	3	2	3	4	3	3	3	4	3	2	3
3	3	2	3	4	5	3	3	3	3	4	5
3	3	2	4	1	4	2	5	3	5	4	4
3	3	2	4	4	5	5	5	5	4	4	5
3	3	2	5	1	6	3	3	2	3	3	1
3	3	3	2	2	1	6	4	4	4	4	5
3	3	3	2	3	4	3	3	3	3	3	3
3	3	3	2	3	4	4	3	3	3	3	5
3	3	3	3	1	4	4	4	3	3	2	3
3	3	3	3	2	3	4	4	4	4	5	4
3	3	3	3	2	3	4	4	5	4	5	4
3	3	3	3	3	2	4	4	4	5	4	4
3	3	3	3	3	2	4	4	5	4	4	5
3	3	3	3	3	3	2	3	3	1	1	1
3	3	3	3	3	3	3	4	4	3	3	3
3	3	3	3	3	3	4	4	4	1	4	4
3	3	3	3	3	3	4	4	4	2	1	2
3	3	3	3	3	3	5	5	4	4	4	4
3	3	3	3	3	4	3	3	4	3	3	3
3	3	3	3	3	5	3	3	3	3	3	2
3	3	3	3	3	5	4	3	3	3	2	2
3	3	3	3	4	3	4	5	4	4	3	4
3	3	3	3	4	4	3	3	3	4	3	3
3	3	3	4	2	4	4	4	4	3	2	4
3	3	3	4	3	3	4	4	4	4	4	4
3	3	3	4	3	3	4	5	5	4	4	3
3	3	3	4	3	4	4	4	3	4	4	4
3	3	3	4	3	4	4	4	4	4	5	6
3	3	3	4	4	4	3	3	3	3	3	3
3	3	3	4	4	4	4	3	3	4	4	5
3	3	3	4	4	5	4	4	4	4	4	5
3	3	3	5	3	3	4	4	4	4	4	4
3	3	4	2	1	2	2	4	3	2	3	1
3	3	4	2	3	3	3	2	3	1	3	2
3	3	4	3	4	3	3	3	3	2	2	1
3	3	4	3	4	4	4	4	4	1	4	5
3	3	4	4	2	3	3	3	4	2	3	1
3	3	4	4	4	4	3	3	3	3	3	3
3	3	4	4	5	5	2	2	2	5	5	2
3	3	4	5	3	3	3	3	3	3	2	2
3	3	4	5	3	4	5	4	4	6	2	4
3	3	4	5	5	4	2	2	2	2	2	2
3	3	4	6	3	3	3	3	3	1	1	1
3	3	5	4	5	5	4	4	4	4	4	5
3	3	6	1	1	2	4	5	6	1	3	3
3	4	1	1	1	1	3	3	2	2	1	3
3	4	3	1	3	3	3	4	4	2	3	2
3	4	3	3	3	3	3	3	3	3	3	3
4	1	1	2	4	4	2	2	4	4	5	5
4	1	3	1	1	1	4	5	4	1	1	1
4	2	1	1	1	3	5	3	6	3	3	3
4	2	2	3	2	4	3	3	3	1	2	1
4	2	4	2	2	2	5	5	6	1	2	1
4	2	4	3	4	5	3	4	5	3	3	3
4	3	2	1	4	5	4	4	2	2	2	2
4	3	2	3	2	2	5	4	4	4	3	4
4	3	2	6	5	5	4	4	5	5	4	4
4	3	3	1	3	5	3	3	4	3	3	1
4	3	3	3	3	3	4	4	4	3	1	1
4	3	3	3	3	3	4	4	4	5	4	4
4	3	3	3	3	6	3	3	4	1	2	1
4	3	3	4	4	3	3	3	4	3	3	3
4	3	3	5	3	3	3	4	3	3	2	3
4	3	4	6	5	5	4	3	5	5	4	4
4	3	5	6	3	4	2	2	3	2	2	1
4	4	3	2	1	1	5	4	5	4	5	4
4	4	5	6	5	5	6	6	6	6	5	6
5	1	1	2	4	5	4	4	5	1	2	1
5	1	1	6	5	5	6	4	1	6	6	6
5	1	4	5	5	6	5	2	3	2	2	1
5	2	2	4	3	5	2	3	2	1	2	1
5	3	2	3	3	4	3	3	4	4	4	4
5	3	2	5	2	4	4	2	4	1	2	3
5	3	3	3	2	4	3	3	3	3	4	4
5	5	5	6	6	5	6	6	6	6	6	5
6	1	3	5	1	5	1	5	1	1	1	1
6	2	1	6	4	6	5	5	3	6	5	6
6	6	6	5	5	6	6	6	5	5	5	6
6	6	6	5	6	5	6	6	6	6	6	6
