# Supplementary material for: Initial Validation of the Mindful Presence Scale: The Issue of the Construal Level of Scale Items
Source: Front Psychol. 2021 Jul 21;12:626084. doi: 10.3389/fpsyg.2021.626084 (PMC8333280; doi:10.3389/fpsyg.2021.626084)
Supplement: Supplementary file 6 [file Table_6.XLSX]

## Sheet: Sheet1
age	gender	nr1	nr2	nr3	nr4	nr5	nr6	nr.mean	EWBS1	EWBS2	EWBS3	EWBS4	EWBS5	EWBS6	EWBS7	EWBS8	EWBS9	EWBS10	EWBS11	EWBS12	EWBS13	EWBS14	EWBS15	EWBS16	EWBS17	EWBS18	EWBS19	EWBS20	EWBS21	ewbs.mean	high.neg1	high.pos1	high.neg2	high.pos2	high.neg3	high.pos3	low.pos1	low.neg1	low.pos2	low.neg2	low.pos3	low.neg3	mps.mean	mpsp.mean	highp.mean	lowp.mean	high.score	low.score	Freib1
49	2	5	5	5	4	4	3	4.33333	4	3	1	4	3	4	4	4	3	4	4	4	4	4	4	4	3	4	3	4	4	3.61905	2	3	2	3	2	3	5	5	4	3	4	3	3.25	3.66667	3	4.33333	#NULL!	#NULL!	3
51	1	5	4	4	1	4	2	3.33333	4	4	4	4	3	3	3	3	4	4	4	2	4	3	4	4	3	3	4	0	4	3.38095	3	4	4	3	3	3	4	4	3	3	3	3	3.33333	3.33333	3.33333	3.33333	#NULL!	#NULL!	3
49	2	5	5	5	5	5	5	5	4	3	2	3	3	4	3	3	4	4	4	4	2	3	4	4	4	4	3	4	4	3.47619	2	2	2	2	3	3	3	3	3	3	3	3	2.66667	2.66667	2.33333	3	#NULL!	#NULL!	3
51	2	5	4	5	4	5	5	4.66667	4	3	2	4	3	3	4	2	3	3	4	4	4	4	4	4	4	4	2	4	4	3.47619	4	4	3	4	4	4	6	6	5	4	6	6	4.66667	4.83333	4	5.66667	#NULL!	#NULL!	4
51	2	5	5	4	4	4	3	4.16667	3	3	2	3	2	2	2	3	2	4	3	3	3	2	3	3	2	3	3	4	2	2.71429	3	4	4	4	4	4	5	4	3	2	3	3	3.58333	3.83333	4	3.66667	#NULL!	#NULL!	3
58	2	5	5	5	4	5	5	4.83333	4	3	4	4	3	3	1	4	4	4	4	4	4	3	4	4	3	3	4	4	1	3.42857	2	3	3	3	2	3	5	4	5	4	3	2	3.25	3.66667	3	4.33333	#NULL!	#NULL!	3
57	2	5	5	3	2	5	3	3.83333	4	3	3	4	3	4	1	3	3	4	1	4	4	3	4	2	3	3	3	4	4	3.19048	2	4	3	4	3	4	3	3	2	3	3	3	3.08333	3.33333	4	2.66667	#NULL!	#NULL!	3
55	2	5	5	5	3	5	5	4.66667	4	4	0	4	4	4	4	4	4	4	4	2	4	4	4	4	4	4	4	4	4	3.71429	3	5	4	5	2	3	5	5	5	4	6	6	4.41667	4.83333	4.33333	5.33333	#NULL!	#NULL!	4
56	2	5	4	5	4	5	4	4.5	3	3	2	4	4	3	1	3	4	4	4	2	4	3	4	4	4	4	4	4	4	3.42857	3	6	1	6	3	4	4	3	4	3	4	3	3.66667	4.66667	5.33333	4	#NULL!	#NULL!	4
52	2	5	4	5	4	5	5	4.66667	4	4	4	4	4	3	4	3	4	3	4	4	4	4	4	4	4	4	4	4	4	3.85714	3	5	4	4	4	4	3	4	3	3	4	4	3.75	3.83333	4.33333	3.33333	#NULL!	#NULL!	4
58	2	5	4	4	3	4	4	4	3	3	2	4	2	4	4	3	4	3	4	4	4	4	4	4	4	4	4	3	4	3.57143	3	3	3	3	4	3	3	3	3	3	2	4	3.08333	2.83333	3	2.66667	#NULL!	#NULL!	4
45	2	5	4	4	3	4	3	3.83333	2	1	3	3	4	4	3	2	1	3	2	4	3	3	3	3	3	3	3	4	3	2.85714	4	4	3	3	3	3	3	3	3	3	2	3	3.08333	3	3.33333	2.66667	#NULL!	#NULL!	3
51	2	5	5	5	4	4	5	4.66667	4	3	4	4	4	4	4	3	2	3	4	2	4	4	4	4	4	4	1	4	3	3.47619	2	2	2	1	2	1	2	2	2	3	2	3	2	1.66667	1.33333	2	#NULL!	#NULL!	4
39	2	4	5	5	3	4	4	4.16667	3	1	4	2	2	3	3	2	2	3	3	4	0	3	3	4	3	2	3	4	2	2.66667	5	4	3	4	4	4	4	4	3	3	2	2	3.5	3.5	4	3	#NULL!	#NULL!	4
53	2	5	4	5	4	4	4	4.33333	3	4	3	4	4	4	3	3	4	4	4	4	4	3	4	4	4	4	2	4	4	3.66667	2	3	1	2	1	6	3	3	4	4	6	5	3.33333	4	3.66667	4.33333	#NULL!	#NULL!	4
59	2	5	4	5	3	4	3	4	3	4	4	4	3	4	4	4	4	3	4	4	4	4	4	4	3	4	4	4	4	3.80952	2	3	2	3	2	3	2	2	2	2	3	2	2.33333	2.66667	3	2.33333	#NULL!	#NULL!	3
52	2	5	5	5	4	5	5	4.83333	3	3	4	4	3	3	4	3	3	4	4	4	4	3	4	4	4	4	4	4	3	3.61905	2	4	3	4	2	4	4	3	3	3	3	3	3.16667	3.66667	4	3.33333	#NULL!	#NULL!	4
60	2	5	4	5	4	5	4	4.5	3	2	2	4	4	2	4	2	3	3	2	3	4	3	4	1	3	4	4	4	2	3	4	3	3	3	3	3	4	5	3	3	2	3	3.25	3	3	3	#NULL!	#NULL!	3
56	2	5	2	5	4	5	5	4.33333	4	4	1	4	4	4	4	4	4	4	4	4	4	4	3	4	4	4	4	4	4	3.80952	5	5	1	5	3	2	6	6	5	4	6	6	4.5	4.83333	4	5.66667	#NULL!	#NULL!	4
50	2	5	5	5	4	5	4	4.66667	3	3	1	4	4	4	0	3	3	4	4	4	3	3	4	4	3	4	1	2	3	3.04762	1	5	2	3	1	3	5	3	4	3	3	2	2.91667	3.83333	3.66667	4	#NULL!	#NULL!	4
51	2	5	4	5	2	5	5	4.33333	4	3	2	4	4	3	3	4	4	3	4	4	4	4	4	4	4	4	4	4	4	3.71429	4	5	3	3	4	4	4	5	2	2	5	5	3.83333	3.83333	4	3.66667	#NULL!	#NULL!	4
53	2	4	4	4	1	4	1	3	4	4	2	3	2	3	4	2	4	4	4	2	2	2	2	4	4	3	2	3	3	3	2	3	3	3	3	3	1	2	1	1	1	1	2	2	3	1	#NULL!	#NULL!	3
58	2	5	5	5	3	5	5	4.66667	4	3	1	3	4	4	4	3	4	4	4	4	4	4	4	4	4	4	4	4	4	3.71429	2	5	4	5	3	4	5	5	4	6	4	6	4.41667	4.5	4.66667	4.33333	#NULL!	#NULL!	4
39	2	5	5	4	4	5	5	4.66667	3	4	4	4	2	3	3	3	2	3	4	4	4	3	4	3	3	4	4	4	3	3.38095	3	3	2	3	2	2	3	2	4	5	4	4	3.08333	3.16667	2.66667	3.66667	#NULL!	#NULL!	4
55	2	5	5	5	4	5	3	4.5	4	3	1	4	4	3	4	4	4	4	4	4	4	4	4	4	4	4	4	4	4	3.76191	2	3	2	2	2	2	3	2	3	2	3	2	2.33333	2.66667	2.33333	3	#NULL!	#NULL!	4
61	2	5	5	5	4	5	5	4.83333	4	4	0	4	4	4	1	4	4	4	4	4	4	3	4	4	4	4	4	4	4	3.61905	3	3	2	3	1	3	5	5	4	5	4	4	3.5	3.66667	3	4.33333	#NULL!	#NULL!	4
52	2	5	4	3	1	4	4	3.5	4	3	4	3	3	3	4	1	3	4	4	4	4	4	3	4	3	3	4	4	3	3.42857	3	3	3	3	3	3	2	2	2	2	1	1	2.33333	2.33333	3	1.66667	#NULL!	#NULL!	3
49	2	5	4	5	2	4	4	4	4	2	4	4	3	3	4	2	3	3	4	4	4	3	4	4	3	4	4	4	3	3.47619	1	1	1	1	1	1	1	1	1	1	1	1	1	1	1	1	#NULL!	#NULL!	4
50	1	5	5	4	5	5	4	4.66667	4	4	4	4	3	3	3	4	4	4	4	4	4	3	4	4	4	4	4	4	3	3.76191	1	4	2	5	5	5	4	5	2	4	3	3	3.58333	3.83333	4.66667	3	#NULL!	#NULL!	3
58	2	5	5	4	3	4	4	4.16667	3	4	3	3	4	4	4	4	4	4	4	2	3	3	3	4	3	4	1	4	4	3.42857	2	4	3	3	3	3	3	4	3	4	3	4	3.25	3.16667	3.33333	3	#NULL!	#NULL!	2
51	2	5	5	5	3	5	3	4.33333	4	4	4	4	4	4	3	3	3	4	4	4	3	3	4	4	4	4	4	4	3	3.71429	1	3	2	4	4	4	4	4	4	4	4	4	3.5	3.83333	3.66667	4	#NULL!	#NULL!	4
49	2	5	4	4	5	4	3	4.16667	3	2	4	3	3	3	3	4	3	3	4	3	3	3	3	4	3	4	4	4	3	3.28571	2	4	4	4	3	3	3	3	3	2	3	3	3.08333	3.33333	3.66667	3	#NULL!	#NULL!	4
58	1	5	4	4	3	5	4	4.16667	4	3	2	4	3	3	4	3	4	3	4	4	4	4	4	4	4	4	4	4	4	3.66667	1	1	3	3	3	3	3	3	4	4	3	3	2.83333	2.83333	2.33333	3.33333	#NULL!	#NULL!	4
41	1	4	5	4	1	4	4	3.66667	4	3	3	3	4	4	4	4	4	3	4	4	4	4	3	4	4	4	3	4	3	3.66667	4	5	4	4	4	4	4	4	3	3	4	4	3.91667	4	4.33333	3.66667	#NULL!	#NULL!	4
48	2	4	4	4	1	3	1	2.83333	2	3	2	3	3	3	3	2	3	3	4	4	3	3	2	3	2	3	4	3	3	2.90476	3	3	3	3	3	3	3	3	4	4	3	3	3.16667	3.16667	3	3.33333	#NULL!	#NULL!	3
51	2	5	4	5	4	5	5	4.66667	4	4	4	4	4	3	4	4	4	4	4	2	4	3	4	4	2	3	1	4	3	3.47619	2	2	1	2	3	3	2	3	3	3	5	5	2.83333	2.83333	2.33333	3.33333	#NULL!	#NULL!	2
52	2	5	5	5	3	4	3	4.16667	4	3	4	4	3	3	4	4	4	4	4	4	4	4	4	4	4	4	4	4	4	3.85714	3	3	2	2	2	2	2	2	3	3	2	2	2.33333	2.33333	2.33333	2.33333	#NULL!	#NULL!	3
57	1	5	5	5	1	5	5	4.33333	4	4	4	4	4	4	4	3	4	4	4	0	4	3	4	4	4	4	4	4	4	3.71429	2	5	2	5	4	5	6	3	4	4	3	3	3.83333	4.66667	5	4.33333	#NULL!	#NULL!	4
59	2	5	4	3	4	3	4	3.83333	3	2	4	4	3	3	2	2	3	1	4	3	3	3	3	4	2	3	3	3	3	2.90476	2	3	3	3	3	3	1	2	2	2	3	4	2.58333	2.5	3	2	#NULL!	#NULL!	3
64	2	5	5	5	3	4	4	4.33333	2	2	2	3	3	3	2	3	3	4	3	2	4	2	3	2	3	4	2	3	3	2.76191	2	2	5	5	3	3	3	3	3	2	3	3	3.08333	3.16667	3.33333	3	#NULL!	#NULL!	3
60	1	5	4	4	4	5	5	4.5	4	3	0	3	4	4	3	4	3	4	1	2	2	3	4	0	4	4	3	1	3	2.80952	2	3	2	3	2	2	5	4	3	3	3	2	2.83333	3.16667	2.66667	3.66667	#NULL!	#NULL!	3
54	2	5	4	3	4	4	4	4	4	0	4	3	4	4	4	3	4	4	4	4	4	4	4	4	3	4	4	4	2	3.57143	3	3	3	3	3	2	4	4	3	3	3	3	3.08333	3	2.66667	3.33333	#NULL!	#NULL!	3
60	2	5	4	4	3	5	5	4.33333	4	4	3	4	3	4	4	4	4	3	4	4	4	4	4	4	4	4	4	4	4	3.85714	3	4	4	4	4	4	4	4	5	6	4	5	4.25	4.16667	4	4.33333	#NULL!	#NULL!	4
50	2	5	5	5	1	5	3	4	4	3	3	3	3	4	4	1	3	4	4	4	4	3	4	4	3	4	3	4	4	3.47619	2	3	2	3	5	2	2	2	3	3	1	3	2.58333	2.33333	2.66667	2	#NULL!	#NULL!	3
59	2	5	4	3	4	4	5	4.16667	4	2	3	3	2	3	3	3	2	2	4	3	3	2	3	3	3	3	4	4	1	2.85714	2	3	2	2	3	2	2	3	3	3	2	3	2.5	2.33333	2.33333	2.33333	#NULL!	#NULL!	3
57	1	5	5	5	4	5	5	4.83333	4	3	2	4	4	4	3	4	4	4	4	4	4	4	4	4	4	4	4	4	4	3.80952	3	3	3	4	3	3	3	3	4	4	3	3	3.25	3.33333	3.33333	3.33333	#NULL!	#NULL!	4
38	2	5	5	5	4	4	4	4.5	4	3	1	4	4	3	2	4	4	4	4	4	4	3	4	4	3	4	3	4	4	3.52381	2	3	3	4	3	4	3	2	3	2	3	2	2.83333	3.33333	3.66667	3	#NULL!	#NULL!	4
50	1	5	5	4	4	5	4	4.5	4	3	4	3	4	3	3	4	2	3	3	4	4	4	4	4	3	4	4	4	3	3.52381	2	3	3	3	1	3	3	2	3	2	4	3	2.66667	3.16667	3	3.33333	#NULL!	#NULL!	4
52	1	4	4	3	2	3	2	3	3	2	2	3	3	2	1	2	1	2	2	3	3	2	3	1	2	3	2	3	2	2.23809	2	3	2	3	3	3	3	3	4	4	3	3	3	3.16667	3	3.33333	#NULL!	#NULL!	2
43	2	5	4	5	5	5	5	4.83333	4	3	3	3	4	3	3	2	3	4	3	3	3	4	4	2	3	4	2	4	2	3.14286	4	4	3	3	4	3	2	3	3	3	1	3	3	2.66667	3.33333	2	#NULL!	#NULL!	3
53	2	5	4	5	3	5	4	4.33333	4	3	1	4	4	3	2	3	3	3	4	4	4	4	4	4	4	4	3	4	4	3.47619	2	2	3	3	3	3	1	1	3	3	1	1	2.16667	2.16667	2.66667	1.66667	#NULL!	#NULL!	2
53	2	5	5	5	3	5	5	4.66667	3	3	4	2	2	3	4	0	1	4	4	4	3	2	4	4	4	3	4	4	3	3.09524	3	2	5	3	4	3	4	3	6	4	3	5	3.75	3.5	2.66667	4.33333	#NULL!	#NULL!	4
60	2	5	5	5	4	5	5	4.83333	3	3	4	4	0	3	4	0	4	4	2	4	4	4	4	4	3	4	4	4	2	3.23809	3	3	3	3	3	4	3	3	4	3	3	4	3.25	3.33333	3.33333	3.33333	#NULL!	#NULL!	3
47	2	5	5	5	3	4	3	4.16667	3	2	4	4	3	3	2	4	4	4	4	2	3	3	3	3	3	3	4	4	3	3.23809	4	4	2	3	2	3	2	3	4	3	3	3	3	3.16667	3.33333	3	#NULL!	#NULL!	3
50	2	5	5	5	4	5	5	4.83333	3	3	0	3	4	3	4	3	3	4	4	4	4	3	4	4	3	4	3	4	3	3.33333	2	2	1	2	2	2	5	6	3	3	3	3	2.83333	2.83333	2	3.66667	#NULL!	#NULL!	3
53	2	5	4	5	4	5	4	4.5	4	3	4	4	4	3	4	0	4	4	4	4	3	3	4	0	3	4	1	4	3	3.19048	2	3	2	3	3	3	3	3	3	3	3	3	2.83333	3	3	3	#NULL!	#NULL!	3
47	2	5	4	3	2	5	4	3.83333	4	4	4	3	4	4	4	1	4	4	4	4	4	3	4	4	4	4	4	4	4	3.76191	5	5	4	4	4	4	1	1	3	3	3	3	3.33333	3.33333	4.33333	2.33333	#NULL!	#NULL!	4
49	2	5	4	5	4	5	5	4.66667	4	3	4	4	3	3	3	4	3	4	4	4	4	4	4	3	4	4	3	4	3	3.61905	1	3	2	3	3	3	3	2	2	1	4	4	2.58333	3	3	3	#NULL!	#NULL!	3
25	2	5	5	5	4	5	4	4.66667	3	2	4	3	4	3	4	4	3	4	4	4	4	4	4	4	4	4	4	4	4	3.71429	4	4	5	3	4	5	5	4	2	2	2	2	3.5	3.5	4	3	#NULL!	#NULL!	3
55	2	5	4	5	1	4	4	3.83333	4	4	4	4	3	4	4	3	4	4	4	4	4	4	4	4	4	4	4	4	4	3.90476	4	5	4	4	3	4	4	5	3	3	3	3	3.75	3.83333	4.33333	3.33333	#NULL!	#NULL!	4
38	2	4	4	4	1	3	4	3.33333	4	1	0	3	3	3	2	3	1	3	4	1	3	3	4	4	3	4	1	3	3	2.66667	1	1	3	3	3	3	3	1	6	6	1	1	2.66667	2.83333	2.33333	3.33333	#NULL!	#NULL!	1
31	2	4	2	1	1	2	1	1.83333	2	3	2	4	2	4	3	2	3	4	4	4	2	3	3	4	3	3	4	4	3	3.14286	3	3	2	1	3	2	1	1	1	1	1	1	1.66667	1.5	2	1	#NULL!	#NULL!	3
52	2	5	5	4	4	4	4	4.33333	3	3	3	3	4	4	3	2	3	3	4	2	4	3	4	4	4	4	4	4	4	3.42857	3	3	2	5	3	3	4	4	4	3	4	4	3.5	3.83333	3.66667	4	#NULL!	#NULL!	4
51	2	5	5	4	4	4	5	4.5	4	3	4	3	4	3	3	2	2	3	4	4	2	3	4	4	3	3	4	4	4	3.33333	4	3	3	4	4	3	4	3	4	4	3	4	3.58333	3.5	3.33333	3.66667	#NULL!	#NULL!	4
50	2	5	5	4	1	5	1	3.5	3	3	2	4	4	4	4	3	3	4	4	4	4	4	4	4	4	4	1	4	3	3.52381	2	2	1	2	2	2	2	2	3	3	2	3	2.16667	2.16667	2	2.33333	#NULL!	#NULL!	3
54	2	5	5	5	1	5	5	4.33333	4	2	0	4	4	4	2	0	2	4	4	4	4	2	4	4	4	4	4	4	3	3.19048	2	6	3	4	3	6	6	6	4	3	2	2	3.91667	4.66667	5.33333	4	#NULL!	#NULL!	4
50	2	4	4	3	2	3	3	3.16667	3	3	2	3	3	3	3	1	2	3	2	4	3	3	3	2	1	2	3	2	2	2.52381	4	3	2	2	2	2	4	5	3	2	3	3	2.91667	2.83333	2.33333	3.33333	#NULL!	#NULL!	3
32	1	4	3	3	5	1	3	3.16667	1	0	3	2	3	3	4	4	0	4	2	4	4	2	4	3	2	4	4	4	2	2.80952	2	2	2	3	2	3	3	3	1	1	1	3	2.16667	2.16667	2.66667	1.66667	#NULL!	#NULL!	4
50	2	5	4	5	3	4	5	4.33333	4	4	4	4	4	3	4	2	3	3	4	2	4	4	4	4	4	4	4	4	3	3.61905	3	4	3	3	2	3	3	3	4	5	6	6	3.75	3.83333	3.33333	4.33333	#NULL!	#NULL!	3
55	2	5	3	5	5	5	4	4.5	3	3	3	4	3	2	0	4	3	3	4	4	1	3	4	4	3	4	4	4	3	3.14286	2	2	1	1	2	1	2	2	2	2	1	1	1.58333	1.5	1.33333	1.66667	#NULL!	#NULL!	3
29	2	4	4	4	4	4	4	4	2	1	3	4	2	1	3	3	2	2	2	4	3	3	4	2	1	2	4	4	2	2.57143	2	3	3	3	3	3	4	4	3	3	3	3	3.08333	3.16667	3	3.33333	#NULL!	#NULL!	3
53	2	5	4	4	3	5	4	4.16667	1	1	4	4	3	3	4	4	1	3	2	4	4	2	4	4	3	4	4	2	2	3	1	3	1	2	2	3	2	2	3	3	1	2	2.08333	2.33333	2.66667	2	#NULL!	#NULL!	4
51	2	5	5	5	3	4	5	4.5	4	4	4	4	4	3	4	0	3	4	4	4	4	3	4	4	4	4	4	4	4	3.66667	3	4	1	6	5	4	2	1	3	3	3	3	3.16667	3.66667	4.66667	2.66667	#NULL!	#NULL!	4
45	2	5	5	5	3	5	4	4.5	4	4	2	4	4	4	4	4	4	4	4	4	4	4	4	4	4	4	4	4	4	3.90476	3	4	3	4	4	4	6	4	3	1	2	1	3.25	3.83333	4	3.66667	#NULL!	#NULL!	3
55	2	5	4	5	2	4	4	4	1	3	3	2	3	3	3	2	4	4	4	4	4	2	4	3	3	4	2	4	2	3.04762	5	4	3	2	3	3	2	2	2	3	3	3	2.91667	2.66667	3	2.33333	#NULL!	#NULL!	3
37	2	5	4	4	1	4	3	3.5	3	2	3	4	3	3	3	4	2	3	2	3	3	2	4	3	2	4	3	4	3	3	2	3	1	2	2	3	3	3	3	2	1	1	2.16667	2.5	2.66667	2.33333	#NULL!	#NULL!	3
42	2	5	4	5	5	5	3	4.5	3	3	3	4	4	4	3	4	4	4	3	3	4	4	4	3	4	4	3	4	4	3.61905	2	5	3	5	4	5	4	5	4	5	4	5	4.25	4.5	5	4	#NULL!	#NULL!	3
56	2	5	4	5	4	4	5	4.5	3	3	2	3	3	4	3	2	3	3	4	4	4	4	4	3	3	4	4	4	4	3.38095	5	5	2	3	3	3	5	5	4	3	2	4	3.66667	3.66667	3.66667	3.66667	#NULL!	#NULL!	4
43	2	5	5	5	3	4	3	4.16667	3	2	3	4	2	3	3	3	3	3	3	4	4	3	4	3	3	4	3	4	4	3.23809	2	4	3	4	3	2	5	4	3	2	5	4	3.41667	3.83333	3.33333	4.33333	#NULL!	#NULL!	3
52	2	5	5	5	4	4	4	4.5	4	4	2	4	4	4	4	3	4	3	4	4	4	4	4	4	3	4	4	4	3	3.71429	1	3	2	3	3	2	4	4	4	3	3	3	2.91667	3.16667	2.66667	3.66667	#NULL!	#NULL!	4
56	2	5	5	5	5	5	5	5	3	3	1	3	3	2	2	3	3	2	3	3	3	3	4	4	3	4	2	4	4	2.95238	2	2	1	6	5	5	5	4	5	5	4	5	4.08333	4.5	4.33333	4.66667	#NULL!	#NULL!	4
63	2	5	5	5	4	5	5	4.83333	4	4	2	3	4	4	4	4	4	1	4	4	4	4	4	4	4	4	2	4	4	3.61905	1	2	2	3	2	3	4	5	4	4	4	4	3.16667	3.33333	2.66667	4	#NULL!	#NULL!	4
50	2	5	5	5	1	5	5	4.33333	2	2	4	2	3	4	4	1	0	1	3	4	2	2	4	2	3	2	4	4	2	2.61905	2	3	3	2	4	4	3	3	3	3	3	3	3	3	3	3	#NULL!	#NULL!	3
46	2	5	4	5	3	5	3	4.16667	2	3	2	4	1	2	2	0	1	1	2	3	2	2	3	3	1	1	3	2	2	2	2	2	2	2	2	2	3	3	2	2	2	2	2.16667	2.16667	2	2.33333	#NULL!	#NULL!	3
57	2	4	4	3	3	3	3	3.33333	3	1	2	4	2	3	2	4	1	2	2	3	3	1	4	1	2	4	4	3	3	2.57143	2	3	2	4	3	3	3	2	2	1	2	2	2.41667	2.83333	3.33333	2.33333	#NULL!	#NULL!	3
56	2	4	4	3	4	4	4	3.83333	3	2	3	3	2	2	3	3	3	2	3	3	2	2	3	3	2	3	3	3	2	2.61905	2	3	3	4	4	3	3	3	3	3	3	3	3.08333	3.16667	3.33333	3	#NULL!	#NULL!	3
53	2	5	4	5	5	4	5	4.66667	3	2	4	4	3	3	1	2	3	4	4	2	4	4	4	4	4	4	4	4	3	3.33333	3	5	4	6	4	6	5	4	5	4	5	4	4.58333	5.33333	5.66667	5	#NULL!	#NULL!	4
59	2	5	4	4	1	4	3	3.5	3	3	1	4	4	4	3	3	4	4	4	4	3	3	4	4	3	4	1	4	2	3.28571	2	4	4	5	4	4	2	3	3	2	2	2	3.08333	3.33333	4.33333	2.33333	#NULL!	#NULL!	3
61	2	2	4	4	2	2	2	2.66667	3	3	2	3	2	3	3	2	2	2	3	3	4	3	3	3	2	3	3	2	3	2.71429	1	2	2	2	2	2	2	1	2	1	2	1	1.66667	2	2	2	#NULL!	#NULL!	2
49	2	5	5	5	3	5	3	4.33333	4	4	4	4	0	4	4	4	3	4	4	4	4	4	4	4	4	4	4	4	4	3.76191	1	3	3	6	5	5	4	5	3	3	3	3	3.66667	4	4.66667	3.33333	#NULL!	#NULL!	4
59	2	5	4	5	1	4	4	3.83333	3	3	1	3	3	2	2	2	2	3	4	4	4	1	0	4	3	3	1	2	4	2.57143	3	4	5	6	4	2	2	5	2	4	3	5	3.75	3.16667	4	2.33333	#NULL!	#NULL!	3
45	2	4	3	3	1	1	1	2.16667	2	2	3	4	2	4	4	1	4	1	4	1	2	4	2	4	2	2	4	4	4	2.85714	2	3	1	2	2	3	1	2	1	2	1	1	1.75	1.83333	2.66667	1	#NULL!	#NULL!	3
51	2	4	4	4	3	4	3	3.66667	3	2	3	3	3	3	3	3	3	3	3	3	3	3	3	3	3	3	3	3	3	2.95238	2	3	2	4	3	3	3	3	3	3	3	3	2.91667	3.16667	3.33333	3	#NULL!	#NULL!	3
45	1	5	5	5	1	5	4	4.16667	4	4	2	3	3	3	4	2	4	4	4	3	4	4	3	4	3	4	3	4	4	3.47619	3	4	3	4	3	4	2	2	4	3	1	1	2.83333	3.16667	4	2.33333	#NULL!	#NULL!	3
47	2	5	5	5	4	5	5	4.83333	4	3	1	3	3	4	3	4	3	2	2	3	4	4	4	2	3	4	4	4	4	3.23809	1	2	1	3	4	3	3	3	3	3	2	3	2.58333	2.66667	2.66667	2.66667	#NULL!	#NULL!	3
50	2	5	5	5	4	5	4	4.66667	3	4	1	4	3	3	4	3	3	4	4	4	3	3	4	4	3	4	4	4	3	3.42857	3	3	3	3	3	3	4	3	4	4	3	3	3.25	3.33333	3	3.66667	#NULL!	#NULL!	4
57	2	5	5	5	5	5	5	5	3	3	3	4	4	3	3	1	3	3	3	3	3	4	4	2	2	4	3	2	3	3	3	4	3	3	2	2	2	2	4	4	2	2	2.75	2.83333	3	2.66667	#NULL!	#NULL!	3
61	2	5	4	3	3	4	3	3.66667	4	4	2	4	2	3	2	3	4	4	4	4	4	4	4	1	4	4	1	1	3	3.14286	3	4	1	3	3	2	6	5	3	2	3	3	3.16667	3.5	3	4	#NULL!	#NULL!	3
55	2	4	2	4	4	4	4	3.66667	4	4	4	4	3	4	3	3	4	3	4	4	4	4	4	4	3	3	1	4	4	3.57143	3	3	3	2	3	3	2	3	2	3	1	3	2.58333	2.16667	2.66667	1.66667	#NULL!	#NULL!	3
58	2	5	5	5	4	5	5	4.83333	4	4	1	4	3	3	4	3	3	4	4	4	3	4	4	1	3	4	4	4	4	3.42857	3	3	3	3	4	4	3	4	3	2	2	3	3.08333	3	3.33333	2.66667	#NULL!	#NULL!	4
59	2	5	5	5	2	4	4	4.16667	4	3	3	3	3	3	2	3	3	3	4	4	3	3	4	4	3	4	4	4	3	3.33333	2	4	3	4	4	4	3	3	3	3	3	3	3.25	3.5	4	3	#NULL!	#NULL!	3
60	2	5	5	5	3	4	3	4.16667	3	3	1	4	4	4	1	4	4	4	4	3	4	4	4	3	4	4	2	4	3	3.38095	1	2	1	5	3	5	1	2	4	6	4	6	3.33333	3.5	4	3	#NULL!	#NULL!	3
53	2	5	5	5	5	5	5	5	3	2	4	3	3	3	3	2	3	4	4	4	4	3	4	4	4	4	4	4	3	3.42857	4	5	4	4	5	4	3	4	4	4	4	5	4.16667	4	4.33333	3.66667	#NULL!	#NULL!	3
52	2	5	5	4	3	4	4	4.16667	3	3	2	3	3	2	2	3	2	3	1	2	3	3	3	2	3	4	3	3	3	2.66667	2	3	2	3	2	2	2	2	3	3	2	2	2.33333	2.5	2.66667	2.33333	#NULL!	#NULL!	3
54	2	4	4	3	3	4	3	3.5	1	2	4	3	3	2	4	3	3	4	4	4	3	3	3	3	3	3	4	2	3	3.04762	2	3	2	3	3	3	5	3	2	2	4	5	3.08333	3.33333	3	3.66667	#NULL!	#NULL!	4
#NULL!	2	4	4	4	4	3	3	3.66667	4	3	4	3	3	3	4	4	3	4	4	4	4	3	4	4	3	4	4	4	3	3.61905	2	3	2	2	2	3	3	3	4	3	3	3	2.75	3	2.66667	3.33333	#NULL!	#NULL!	4
60	2	5	4	4	3	4	4	4	2	3	4	3	3	3	3	3	3	4	4	4	3	3	4	4	3	4	4	4	3	3.38095	2	3	4	3	3	3	3	3	2	3	2	3	2.83333	2.66667	3	2.33333	#NULL!	#NULL!	3
45	2	5	4	4	4	4	3	4	4	3	3	4	1	2	2	3	3	4	4	3	1	3	3	3	2	3	3	3	2	2.80952	2	3	2	2	3	3	1	3	2	2	1	2	2.16667	2	2.66667	1.33333	#NULL!	#NULL!	2
49	1	5	4	4	3	4	3	3.83333	4	3	2	4	3	3	3	2	4	3	3	4	3	2	2	4	1	2	2	4	4	2.95238	3	3	3	3	3	3	2	3	2	3	2	3	2.75	2.5	3	2	#NULL!	#NULL!	3
42	2	4	5	5	3	5	5	4.5	4	4	4	4	4	4	4	3	4	3	4	4	4	3	4	4	3	4	4	4	4	3.80952	2	3	2	2	2	2	1	2	5	5	1	1	2.33333	2.33333	2.33333	2.33333	#NULL!	#NULL!	3
53	2	5	4	3	1	4	3	3.33333	3	3	4	3	4	4	4	2	3	3	4	4	4	3	4	3	3	4	4	4	2	3.42857	3	2	1	1	2	2	1	1	1	1	1	5	1.75	1.33333	1.66667	1	#NULL!	#NULL!	4
49	1	4	2	5	5	4	3	3.83333	3	0	4	1	4	1	1	3	0	1	0	4	4	1	4	1	1	4	3	3	0	2.04762	2	2	1	1	1	1	2	3	2	2	1	1	1.58333	1.5	1.33333	1.66667	#NULL!	#NULL!	2
50	2	4	3	2	1	2	2	2.33333	3	1	4	3	1	3	3	3	1	1	2	4	2	1	3	3	2	2	3	3	1	2.33333	3	2	4	3	4	3	1	6	1	6	1	3	3.08333	1.83333	2.66667	1	#NULL!	#NULL!	3
51	2	5	4	4	2	3	3	3.5	4	3	2	4	4	4	2	3	4	2	3	3	3	3	4	4	3	4	4	3	3	3.28571	2	3	3	4	3	3	3	4	4	4	4	4	3.41667	3.5	3.33333	3.66667	#NULL!	#NULL!	4
49	2	5	3	3	2	2	2	2.83333	3	3	3	4	2	2	4	2	3	1	4	4	2	4	4	4	3	4	1	4	3	3.04762	4	2	3	3	2	2	1	3	2	3	1	2	2.33333	1.83333	2.33333	1.33333	#NULL!	#NULL!	3
40	2	5	5	5	4	4	4	4.5	4	3	4	4	4	4	4	4	3	4	4	4	4	3	4	4	4	4	4	4	3	3.80952	2	2	2	2	2	2	3	2	2	2	3	3	2.25	2.33333	2	2.66667	#NULL!	#NULL!	3
64	2	4	4	4	2	2	1	2.83333	4	4	3	3	3	4	4	3	4	3	4	3	4	3	3	4	3	3	3	4	4	3.47619	3	3	3	3	3	3	3	2	4	4	2	3	3	3	3	3	#NULL!	#NULL!	3
53	2	5	4	3	1	2	1	2.66667	4	4	3	4	4	4	4	4	4	3	4	4	4	3	4	4	4	4	4	4	4	3.85714	2	4	3	4	3	4	3	3	3	3	3	3	3.16667	3.5	4	3	#NULL!	#NULL!	3
49	2	4	3	5	3	4	4	3.83333	4	2	2	3	3	3	4	3	3	3	3	4	4	3	4	3	3	4	4	4	3	3.28571	3	3	4	3	3	3	3	3	3	3	3	3	3.08333	3	3	3	#NULL!	#NULL!	3
64	2	5	5	4	3	5	3	4.16667	3	3	2	4	4	3	3	2	3	4	4	4	3	3	4	3	3	3	3	4	3	3.23809	2	5	3	4	2	3	4	2	4	3	5	2	3.25	4.16667	4	4.33333	#NULL!	#NULL!	3
46	2	5	4	5	1	5	5	4.16667	4	3	2	3	2	4	4	4	1	0	3	4	4	4	4	4	3	3	4	4	4	3.23809	1	1	1	1	1	1	6	6	6	6	1	1	2.66667	2.66667	1	4.33333	#NULL!	#NULL!	3
24	2	5	4	4	3	4	5	4.16667	3	3	3	3	4	2	3	2	0	3	4	4	4	3	4	3	2	4	3	4	3	3.04762	3	3	2	2	3	2	3	3	5	5	1	2	2.83333	2.66667	2.33333	3	#NULL!	#NULL!	3
36	2	5	5	5	4	5	5	4.83333	4	3	3	4	3	4	3	4	4	4	4	4	2	3	4	4	4	4	3	4	3	3.57143	2	2	3	2	1	2	4	4	3	3	4	5	2.91667	2.83333	2	3.66667	#NULL!	#NULL!	3
50	2	5	4	4	2	4	4	3.83333	4	2	2	3	4	3	4	4	3	4	4	4	4	4	4	4	3	4	4	4	3	3.57143	5	4	4	4	2	4	5	4	4	4	3	3	3.83333	4	4	4	#NULL!	#NULL!	4
55	2	5	4	5	4	4	5	4.5	4	4	2	4	3	4	3	3	4	3	3	2	4	4	3	4	2	3	3	4	4	3.33333	2	4	3	4	2	4	5	2	3	2	4	3	3.16667	4	4	4	#NULL!	#NULL!	3
58	2	5	5	5	4	5	4	4.66667	4	4	4	4	4	4	4	4	4	4	4	3	4	3	3	4	4	4	4	4	3	3.80952	5	4	3	4	2	4	6	6	5	4	6	4	4.41667	4.83333	4	5.66667	#NULL!	#NULL!	3
47	2	4	5	4	2	4	4	3.83333	4	3	3	3	2	3	4	3	2	4	4	4	4	4	4	4	4	4	4	4	3	3.52381	4	5	4	3	3	2	5	5	3	3	2	2	3.41667	3.33333	3.33333	3.33333	#NULL!	#NULL!	2
39	2	5	5	5	3	4	5	4.5	4	4	1	4	4	4	3	1	4	3	4	2	4	4	4	4	3	4	2	1	4	3.23809	4	4	4	4	4	4	6	6	5	5	4	6	4.66667	4.5	4	5	#NULL!	#NULL!	4
[truncated: 131 more columns]
